# Supplementary material for: FOXM1 inhibition primes terminal differentiation of human iPSC-derived hepatocytes
Source: Research Square preprint supplement (doi:10.21203/rs.3.rs-7594791/v1), 2025-12-10
Supplement: Supplementary file 1 [file b60e71518204311c3ac1fcda.pdf]

Supplementary Materials for  
**Unraveling liver development: FOXM1 inhibition drives terminal  
differentiation of human iPSC-derived hepatocytes**

Kayque Alves Telles-Silva *et al.*

\*Corresponding author: [mayazatz@usp.br](mailto:mayazatz@usp.br).

**This PDF file includes:**

Supplementary Text  
Figs. S1 to S3  
Tables S1 to S4  
References (1 to 4)

## **Supplementary Text**

### **hiPSC cell maintenance**

All cell culture experiments used three human induced pluripotent stem cells (hiPSCs) from healthy male participants. WTC-11, a characterized control cell line (1), was purchased from the NIGMS Repository. Three other lines (7007, 7405, and 8799) were established at the Human and Stem Cell Research Center. hiPSCs were maintained on 10  $\mu\text{g}/\text{cm}^2$  hESC-qualified Matrigel (Corning)-coated plates using Essential 8 Medium (Thermo Fisher) with 100  $\mu\text{g}/\text{mL}$  Normocin (InvivoGen). The medium was replaced daily. Cells were split every 3-4 days using Accutase (Gibco), seeded at  $3 \times 10^4$  cells/ $\text{cm}^2$  in Essential 8 medium with 5  $\mu\text{M}$  Y-27632 (Sigma-Aldrich) for 24h, and maintained until passage 30 (p30).

### **Hepatocyte differentiation**

Hepatocyte differentiation was performed as described previously (60). Single-cell hiPSCs were seeded in Matrigel-coated 6-well plates at  $7 \times 10^5$  cells/well in Essential 8 medium with Y-27632. At 40% confluency on day 2, the medium was changed to RPMI 1640 with 2% B-27 minus Vitamin A 100 ng/mL Activin A 25 ng/mL Wnt3a, and 100  $\mu\text{g}/\text{mL}$  normocin. The medium was changed daily for three days and then extended without Activin A two more days. On day 6, the medium was switched to Knockout DMEM with 20% Knockout Serum Replacement, 1% DMSO, 0.5% Glutamax, 1% NEAA, 0.1 mM beta-mercaptoethanol, and 100  $\mu\text{g}/\text{mL}$  normocin, and changed daily from days 6 to 8 and on day 10. On day 11, the medium was switched to the Hepatocyte Culture Medium BulletKit with 20 ng/mL oncostatin M and 100  $\mu\text{g}/\text{mL}$  normocin, changed every 48h until day 20.

### **Transmission electron microscopy**

For transmission electron microscopy (TEM), the cells were dissociated using TrypLE Express (Thermo Fisher Scientific) and pelleted. The Pellets were fixed in 2.5% (v/v) glutaraldehyde in PBS (1x) for 2 h at 4°C, post-fixed in 1% OsO<sub>4</sub> for 1 h at 4°C, and stained overnight in 1% aqueous uranyl acetate. The pellets were sequentially dehydrated in 30%, 70%, and 100% ethanol. The samples were then embedded in epoxy resin. Ultrathin sections (70 nm) were obtained using an ultramicrotome, collected on nickel grids, and double stained with uranyl acetate and lead citrate. Micrographs were obtained using a JEOL JEM 1010 electron microscope (80 kV).

### **Comet assay**

A comet assay was performed to evaluate genomic DNA damage. The cells were resuspended in agarose, distributed on slides previously coated with the same material, and allowed to solidify for 30 minutes at 4°C. After hardening, the slides were treated with a lysis buffer at 4°C for at least 40 min. After cell membrane lysis and DNA exposure, slides were immersed in an alkaline unwinding solution for 20 min at room temperature. Electrophoresis was conducted in a denaturation buffer at 21 Volts and 0.3 A for 30 min. Staining was performed with SYBR Green (Thermo Fisher Scientific). Images were captured using an Axiovert 200 fluorescence microscope, and 100 nuclei per condition were analyzed using LUCIA Comet Assay software (Laboratory Image). The head/tail DNA ratio (tail momentum) was calculated by using 100 comets on each slide for each sample.

### Hi-C analysis

To prepare the Hi-C library,  $1-5 \times 10^6$  cells were dissociated using trypsin for 15 min, centrifuged at  $500 \times g$  for 5 min, washed with PBS, and fixed with 1% paraformaldehyde for 10–12 min. After glycine quenching, cells were pelleted, washed, and stored at  $-80^\circ\text{C}$ . Thawed cells were lysed and digested with 300 U of DpnII. The DNA ends were labeled with biotin-14-dCTP using Klenow fragments and ligated with T4 DNA ligase. Crosslinks were reversed using Proteinase K at  $65^\circ\text{C}$ , followed by ethanol precipitation. Unligated biotinylated ends were removed using T4 DNA polymerase. NGS libraries were prepared using the KAPA HyperPlus Kit, with biotin-labeled products enriched using Dynabeads MyOne Streptavidin C1, before amplification. Sequencing used 150 bp paired-end reads. Hi-C data were processed using Juicer and Cooltools .hic and .cool files. Quality metrics were computed using a modified Juicer script. Differentially expressed gene loci were analyzed using normalized Hi-C maps and were visualized using the FANC library. Compartmentalization strength was assessed using cooltools saddle and saddle\_strength, with eigenvector decomposition for A/B compartment assignment.

To compare TAD boundary strength between conditions (PHH, control, and Etoposide-treated), we generated scatter plots for each pairwise comparison. Insulation scores were calculated at 25 kb resolution using the cooltools insulation function. The resulting .bed files containing insulation scores were intersected with .bedpe files of TAD boundaries to assign a score to each boundary. For each pairwise comparison, boundaries showing an insulation score difference greater than 3 standard deviations from the main distribution were considered outliers. These outlier regions were subsequently visually validated using Juicebox.

We used two independent sets of chromatin loops in this study. The first set was identified using HiCCUPS (2). Loop length was calculated as the genomic distance between the centroids of loop anchors. For the Venn diagram, loop anchor regions were extended by 10 kb on each side, and pairwise intersections were performed between loops identified in Control, PHH, and Etoposide-treated samples. Loop strength was evaluated using a custom script that calculated the average value of pixels in the balanced submatrix around each loop, derived from matrices normalized with cooltools balance. Additionally, z-scores were computed to evaluate the median loop strength in PHH samples deviated from the distribution observed iPSC-derived. The second set of loops was identified using the cooltools dots (ref 2), which detect focal enrichments in contact matrices after estimating expected contact frequencies with cooltools expected-cis. Aggregation of contact signals over loop regions was performed with coolpup.py, followed by visualization using plotpup.py (3).

The contact probability as a function of genomic distance,  $P(s)$ , was analyzed to assess chromatin scaling laws. Smoothed and aggregated contact frequency curves were computed using cooltools expected-cis with Gaussian smoothing ( $\sigma = 0.1$ ). Log-log plots of  $P(s)$  were generated to visualize contact decay profiles, and first derivatives were computed to highlight changes in the scaling slope across genomic distances (4).

### Immunostaining

For immunostaining, cells were fixed with 4% paraformaldehyde for 15 min and washed three times with PBS (1x). The samples were permeabilized with 0.01% Triton X-100 in PBS (1x) for 30 min, followed by blocking with 5% bovine serum albumin (BSA) in PBS (1x) for 1 h. The samples were incubated with primary antibodies (listed in Supplementary Table 2) at  $4^\circ\text{C}$

overnight with gentle shaking. The samples were then incubated with secondary antibodies (Supplementary Table 2) at 4 °C for 1 h at room temperature. Nuclei were counterstained 4°Cth DAPI (Sigma) for 1 min at room temperature. Samples were imaged using a Zeiss LSM 800 confocal microscope (Zeiss). Images were analyzed using ImageJ software (v2.0.0).

### **Western blotting**

For western blotting, cells were lysed using RIPA Buffer with Protease and Phosphatase Inhibitor Cocktail (Thermo Fisher). Proteins were quantified using a Pierce BCA Protein Assay Kit. Twenty micrograms of protein was denatured using NuPAGE LDS Sample Buffer at 70°C for 10 min. Precision Plus Protein Western C standards were used as size standards. Proteins were loaded onto Novex Tris-Glycine Mini Protein Gels at 120 V for 1 h and then dry-transferred to iBlot 2 PVDF membranes using an iBlot2 Gel Transfer Device. The membranes were blocked with 5% bovine serum albumin (BSA) in TBST for 1 h at room temperature. The membranes were incubated with primary antibodies (Supplementary Table 4) at 4°C overnight using GAPDH as the endogenous control. After washing with TBST, the membranes were incubated with horseradish peroxidase-conjugated secondary antibodies for 1 h. Chemiluminescence was detected using the Amersham ECL Prime Reagent. Protein bands were imaged using the ChemiDoc MP System and analyzed using the ImageLab software.

### **Metabolite assays**

Total cholesterol and triglyceride secretion was measured by collecting 1 mL of the supernatant from HLCs cultured in HCM and stored at –80 °C until use. The supernatant was assayed using the HDL and LDL/VLDL Cholesterol Assay Kit (Abcam, ab65390) and Triglyceride Assay Kit (Abcam, ab65336) following the manufacturer's instructions.

### **Protein secretion and metabolic activity assays**

Human ALB and AFP secretion were measured by collecting 1 mL of the supernatant from HLCs cultured in HCM and stored at –80 °C until use. The supernatant was assayed using the Human Albumin ELISA Kit (Thermo Fisher, EHALB) and Human Alfa Fetoprotein ELISA Kit (Abcam, ab108838) according to the manufacturer's instructions. Similarly, metabolic activity was measured using the Alanine Transaminase (ALT) Activity Assay (Abcam, ab105134), Aspartate Aminotransferase (AST) Activity Assay (Abcam, ab105135), P450-Glo CYP1A2 Induction/Inhibition Assay (Promega, V8421), and P450-Glo CYP2B6 Assay (Promega, V8321), according to the manufacturer's instructions.

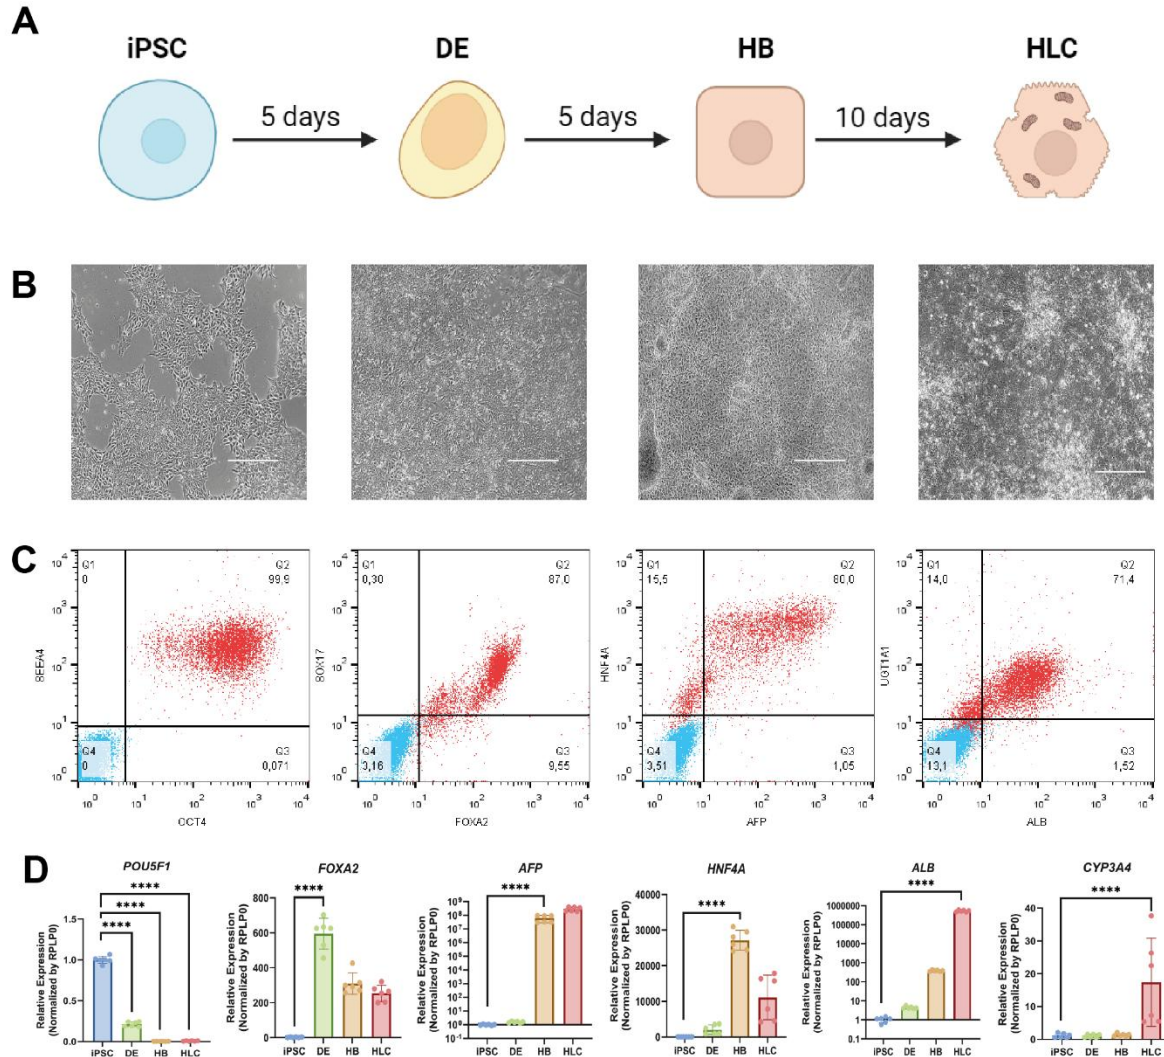

**Fig. S1: Differentiating iPSCs into HLCs.** **A)** Schematic for iPSC differentiation into HLCs. iPSC, induced pluripotent stem cell; DE, definitive endoderm; HB, hepatoblast; HLC, hepatocyte-like cell. **B)** Brightfield images of differentiation progression from iPSCs to HLCs (scale bar = 400  $\mu$ m). **C)** Stepwise flow cytometry characterization of iPSC differentiation into HLCs for hiPSC markers OCT3/4 and SSEA4; pan-endoderm markers FOXA2 and SOX17; hepatoblast markers AFP and HNF4A; and pan-hepatocyte markers ALB and UGT1A1. Blue, negative isotype-stained control; Red, cell from the respective differentiation stage ( $n = 2$ , biological replicates and 3 independent experiments). **D)** Stepwise RT-qPCR characterization of iPSC differentiation into HLCs for the iPSC marker *POU5F1*; the endoderm marker *FOXA2*; the hepatoblast markers *AFP* and *HNF4A*; and the hepatocyte markers *ALB* and *CYP3A4* (Data is mean  $\pm$  SD; \*\*\*\* $p < 0.001$ ;  $n = 2$ , biological replicates and 3 independent experiments). In D, one-way ANOVA with multiple comparisons and Tukey's correction.

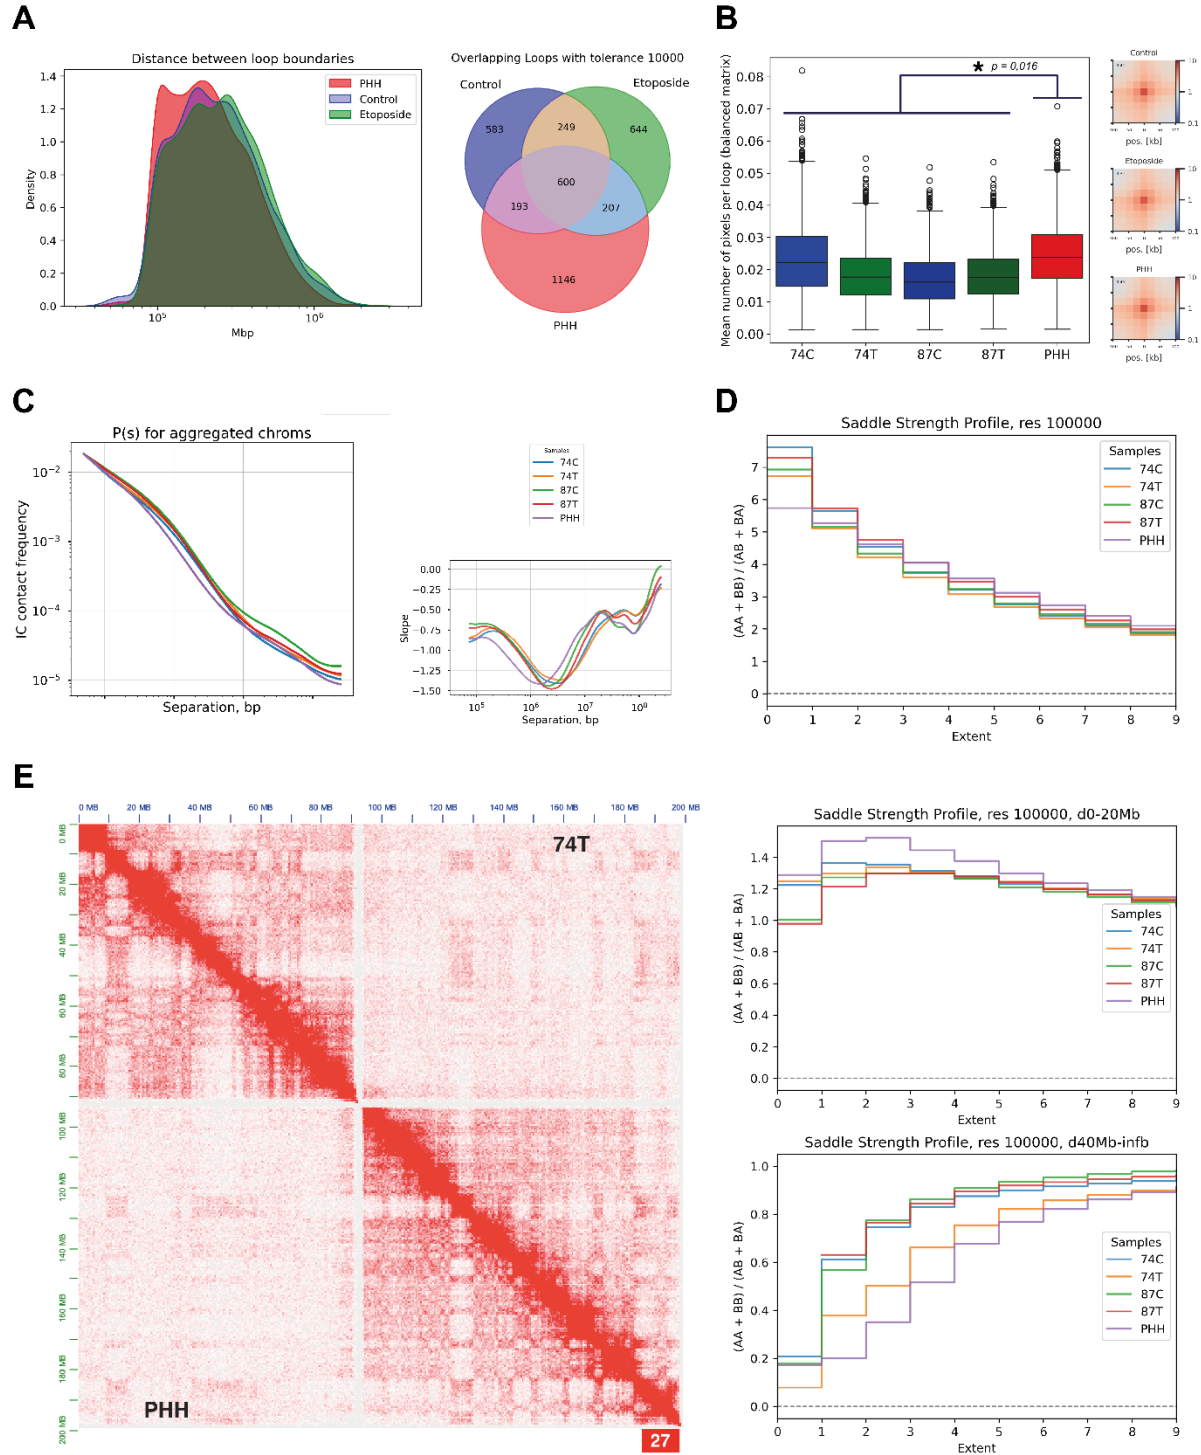

**Fig. S2: Hi-C analysis of etoposide-treated HLCs.** **A)** Loop characteristics and overlap across PHH, control, and etoposide-treated samples. Left, distribution of loop lengths (measured as the genomic distance between loop anchors) for each condition. Right, Venn diagram of overlapping chromatin loops across conditions, using a 10 kb tolerance for anchor matching. **B)** Aggregate loop signal and strength. Left, boxplot of loop strength values computed from balanced contact matrices ( $z = 2.14$ ,  $p = 0.016$ ). Right, average pileup plots of chromatin loops. **C)** Contact probability decay curves and their derivatives for aggregated chromosomes. Left,  $P(s)$  plots

showing the probability of chromatin contacts as a function of genomic separation. Right, first derivative of the log-transformed  $P(s)$  curves. **D)** Compartmentalization strength profiles in 100 Kb resolution. **E)** Compartmentalization between PHH and HLCs at different genomic distances. Left, contact maps of chromosome 3 from PHH vs 74T. Right, saddle strength profiles for mid-range interactions (0–20 Mb) and long-range interactions (>40 Mb) at 100 kb resolution. 74C and 87C, vehicle controls; 74C and 87T, etoposide-treated HLCs; PHH, primary human hepatocytes ( $n = 2$ , biological replicates; data displayed as mean  $\pm$  SD).

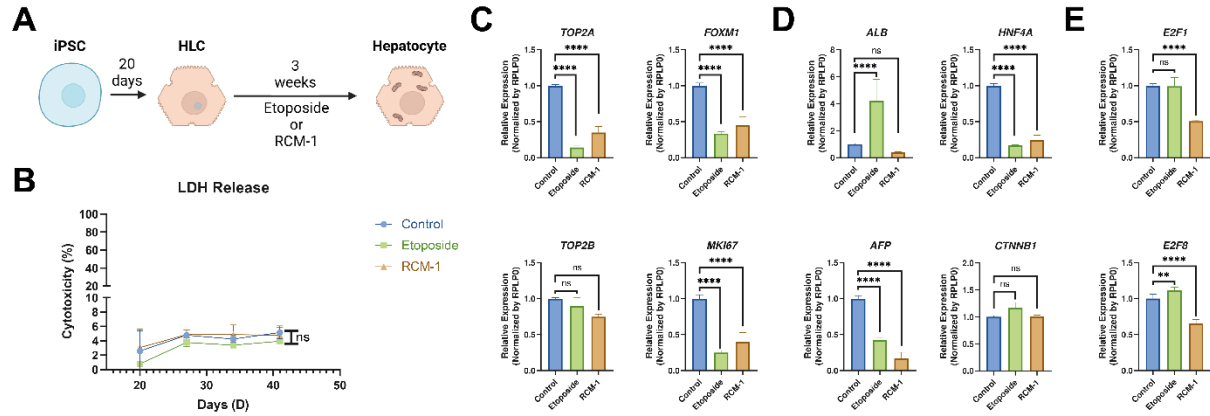

**Fig. S3: Characterization of long-term exposure to RCM-1 and etoposide.** **A)** Schematic of long-term treatment of HLCs with etoposide or RCM-1. **B)** Cytotoxicity assay (LDH release) of HLCs with RCM-1, etoposide, or 1% DMSO (control) for 41 days. **C-E)** RT-qPCR of *TOP2A*, *TOP2B*, *FOXM1*, and *MKI67* (**C**); *ALB*, *AFP*, *HNF4A*, and *CTNNB1* (**D**); or *E2F1* and *E2F8* (**E**) of control, etoposide- and RCM-1-treated HLCs. In every experiment,  $n = 2$  biological replicates and 3 independent experiments. In all experiments, data is mean  $\pm$  SD. In all experiments, one-way ANOVA with multiple comparisons and Tukey's correction ( $p < 0.05$ ).



**Table S1. Primer Sequence for RT-qPCR**

| <b>Gene</b>   | <b>Forward</b>           | <b>Reverse</b>           |
|---------------|--------------------------|--------------------------|
| <i>AFP</i>    | CAGGGTGTTTAGAAAACCAGCTAC | TGCAGCAGTCTGAATGTCCG     |
| <i>ALB</i>    | CTCGGCTTATTCCAGGGGTG     | AAAGGCAATCAACACCAAGGC    |
| <i>CDKN1A</i> | TGTCTTGTACCCTTGTGCCTC    | CGTTTGGAGTGGTAGAAATCTGTC |
| <i>CENPF</i>  | AGATGGAGTCCAAGTTGGCG     | CGGCCTTGAATAGCATCTTCTG   |
|               |                          | ACTCCATCAAATCAGCTTGAGTAG |
| <i>CTNNB1</i> | CCTGTTCCCCTGAGGGTATTTG   | C                        |
| <i>CYP3A4</i> | ACCTTGTAAGAAACACAGATCCC  | TCAGGCTCCACTTACGGTG      |
| <i>E2F1</i>   | CAGGAGGTCACTTCTGAGGAGG   | GACAACAGCGGTTCTTGCTCC    |
| <i>E2F8</i>   | GGAATTTTCGGGCAGCTTCTG    | TGAGGCGTTGACACCAAAAAC    |
| <i>FOXA2</i>  | TGCACTCGGCTTCCAGTATG     | CATGTTGCTCACGGAGGAGT     |
| <i>FOXM1</i>  | AAACGGGAGACCTGTGATGG     | ATCTCTTGCTTGATGCTGCG     |
| <i>GLB1</i>   | TGTGCAGAGTGGGAAATGGG     | CTGCCAGGTAATCTGGGTGCG    |
| <i>GUSB</i>   | TTCCTATGCCATCGTGTGGG     | TGGCGATAGTGATTTCGGAGC    |
| <i>HNF4A</i>  | TGGACAAAGACAAGAGGAACC    | ATAGCTTGACCTTCGAGTGC     |
| <i>MKI67</i>  | GGATCGTCCCAGTGGAAGAG     | GTCTCGTGGGCCACATTTTC     |
| <i>PLK1</i>   | AGTGTCAATGCCTCCAAGCC     | TCACAGAGCTGATACCCAAGG    |
| <i>POU5F1</i> | AATTTGTTTCCTGCAGTGCCC    | CACACTCGGACCACATCCTTC    |
| <i>RPLP0</i>  | CATATCCGGGGGAATGTGGG     | CAGCAGCTGGCACCTTATTG     |
| <i>TOP2A</i>  | ACCAAGAATCGCCGAAAAG      | TCTCCCCCTTGGATTTCTTGC    |
|               | TCTCAGAAGTCAGAAGATGATTCA |                          |
| <i>TOP2B</i>  | G                        | TCTGTTTCAGACCAAATGATGGTG |

**Table S2. Antibodies for Immunostaining**

| <b>Antibody</b>             | <b>Catalog Number</b> | <b>Host Species</b> | <b>Assay Dilution</b> |
|-----------------------------|-----------------------|---------------------|-----------------------|
| Anti-FOXM1                  | 711695                | Rabbit              | 1:100                 |
| Anti-phospho-FOXM1 (Thr600) | PA5-105625            | Rabbit              | 1:100                 |
| Goat Anti-Rabbit Alexa 546  | A11010                | Goat                | 1:1,000               |

**Table S3. Antibodies for Flow Cytometry**

| <b>Antibody</b>             | <b>Catalog Number</b> | <b>Host Species</b> | <b>Assay Dilution</b> |
|-----------------------------|-----------------------|---------------------|-----------------------|
| AFP                         | PA5-21-004            | Rabbit              | 1:100                 |
| ALB                         | ab106582              | Chicken             | 1:100                 |
| FOXA2                       | ab60721               | Mouse               | 1:100                 |
| HNF4A                       | ab41898               | Mouse               | 1:100                 |
| OCT3/4                      | ab19857               | Rabbit              | 1:100                 |
| SOX17                       | 703063                | Rabbit              | 1:100                 |
| SSEA4                       | ab16287               | Mouse               | 1:100                 |
| UGT1A1                      | ab129729              | Mouse               | 1:100                 |
| $\gamma$ H2AX               | MA5-33062             | Rabbit              | 1:100                 |
| Donkey Anti-Mouse Alexa 546 | A10036                | Donkey              | 1:1,000               |
| Goat Anti-Mouse Alexa 488   | 11001                 | Goat                | 1:1,000               |
| Goat Anti-Rabbit Alexa 488  | 11034                 | Goat                | 1:1,000               |
| Goat Anti-Rabbit Alexa 546  | A11010                | Goat                | 1:1,000               |
| Goat Anti-Chicken Alexa 488 | A0001                 | Goat                | 1:1,000               |

**Table S4. Antibodies for Western Blotting**

| <b>Antibody</b>      | <b>Catalog Number</b> | <b>Host Species</b> | <b>Assay Dilution</b> |
|----------------------|-----------------------|---------------------|-----------------------|
| AFP                  | ab133617              | Rabbit              | 1:1,000               |
| ALB                  | ab207327              | Rabbit              | 1:1,000               |
| CTNNB1               | 9582P                 | Rabbit              | 1:1,000               |
| ERK1/2               | 4695S                 | Rabbit              | 1:1,000               |
| GAPDH                | PA1-987               | Rabbit              | 1:1,000               |
| SMAD1                | 6944P                 | Rabbit              | 1:1,000               |
| YAP/TAZ              | 8418                  | Rabbit              | 1:1,000               |
| TOP2A                | ab219320              | Mouse               | 1:1,000               |
| Goat Anti-Rabbit HRP | 7074S                 | Goat                | 1:5,000               |
| Goat Anti-Mouse HRP  | 7076S                 | Goat                | 1:5,000               |
